# Supplementary material for: Temporal Trends in Heart Failure Incidence Among Medicare Beneficiaries Across Risk Factor Strata, 2011 to 2016
Source: PubMed Central journal article supplement (PMC7584929; doi:10.1001/jamanetworkopen.2020.22190), 2020-10-23
Supplement: jamanetwopen-e2022190-s001.pdf [file jamanetwopen-e2022190-s001.pdf]

## Supplementary Online Content

Khera R, Kondamudi N, Zhong L, et al. Temporal trends in heart failure incidence among Medicare beneficiaries across risk factor strata, 2011 to 2016. *JAMA Netw Open*. 2020;3(10):e2022190. doi:10.1001/jamanetworkopen.2020.22190

**eTable 1.** International Classification of Diseases (ICD) 9 & 10 Codes Used to Identify Medicare Beneficiaries With Prevalent Primary and Secondary Heart Failure Risk Factors

**eTable 2.** Clinical Characteristics of Medicare Beneficiaries Without Prevalent Heart Failure in the Beginning of Each Calendar Year During the Study Period

**eTable 3.** Studies Reporting Heart Failure Incidence Trends

**eFigure 1.** Percentage of Beneficiaries in Each Comorbid Group Among Those Who Developed Heart Failure and Those Who Did Not Develop Heart Failure, Yearly Trend

**eFigure 2.** 30-Day Mortality Rate Among Beneficiaries With Incident Heart Failure Stratified by Sex and Race, Yearly Trend

**eFigure 3.** Incident Rate of Heart Failure Among Beneficiaries by Comorbid Groups

**eFigure 4.** Adjusted Incidence Rate Ratios for Heart Failure Among Beneficiaries With vs Without Each Risk Factor Over Time

### eReferences.

This supplementary material has been provided by the authors to give readers additional information about their work.

**eTable 1.** International Classification of Disease (ICD) 9 & 10 Codes Used to Identify Medicare Beneficiaries with Prevalent Primary and Secondary Heart Failure Risk Factors

|                                    |                                                                                                                                                                                                                                                                                                                                                                                                                                                                                                                                                                                                                                        |
|------------------------------------|----------------------------------------------------------------------------------------------------------------------------------------------------------------------------------------------------------------------------------------------------------------------------------------------------------------------------------------------------------------------------------------------------------------------------------------------------------------------------------------------------------------------------------------------------------------------------------------------------------------------------------------|
| <b>Hypertension</b>                | ICD 9 diagnoses including '4011','4019','4010','40200','40201','40210','40211','40290','40291','4030','40300','40301','4031','40310','40311','4039','40390','40391','4040','40400','40401','40402','40403','4041','40410','40411','40412','40413','4049','40490','40491','40492','40493','40501','40509','40511','40519','40591','40599','4372' or ICD 10 CCS diagnosis groups '98','99'                                                                                                                                                                                                                                               |
| <b>Diabetes</b>                    | ICD9 diagnoses including '24900','25000','25001','7902','79021','79022','79029','7915','7916','V4585','V5391','V6546','24901','24910','24911','24920','24921','24930','24931','24940','24941','24950','24951','24960','24961','24970','24971','24980','24981','24990','24991','25002','25003','25010','25011','25012','25013','25020','25021','25022','25023','25030','25031','25032','25033','25040','25041','25042','25043','25050','25051','25052','25053','25060','25061','25062','25063','25070','25071','25072','25073','25080','25081','25082','25083','25090','25091','25092','25093') or ICD 10 CC diagnosis groups '49','50' |
| <b>Atrial Fibrillation</b>         | ICD9 diagnoses including '42731' or ICD 10 diagnosis I48.xx                                                                                                                                                                                                                                                                                                                                                                                                                                                                                                                                                                            |
| <b>Obesity</b>                     | ICD9 diagnoses including '2780','27800','27801','27802','27803','79391','V8521','V8522','V8523','V8524','V8525','V8530','V8531','V8532','V8533','V8534','V8535','V8536','V8537','V8538','V8539','V854','V8541','V8542','V8543','V8544','V8545','V8554','Z6841','Z6842','Z6843','Z6844','Z6845' or ICD 10 diagnosis group with E66                                                                                                                                                                                                                                                                                                      |
| <b>Acute Myocardial Infarction</b> | ICD9 substrate CD1. 1,3) in ('410') and substrate CD1,5,5) not in ('2') or ICD 10 CCS diagnosis group '100'                                                                                                                                                                                                                                                                                                                                                                                                                                                                                                                            |

Abbreviations: CCS, clinical classification software; ICD, International Classification of Disease

**eTable 2.** Clinical Characteristics of Medicare Beneficiaries Without Prevalent Heart Failure in the Beginning of Each Calendar Year During the Study Period<sup>a</sup>

|                             | 2011              | 2012              | 2013              | 2014              | 2015              | 2016              |
|-----------------------------|-------------------|-------------------|-------------------|-------------------|-------------------|-------------------|
| N                           | 1,426,256         | 1,422,429         | 1,432,268         | 1,433,868         | 1,431,496         | 1,416,971         |
| Age (y), median, IQR        | 73 (68,79)        | 73 (68,79)        | 73 (68,79)        | 73 (68,79)        | 73 (68,79)        | 73 (69,79)        |
| Men, %                      | 621196<br>(43.6)  | 621381<br>(43.7)  | 627489<br>(43.8)  | 629180<br>(43.9)  | 628102<br>(43.9)  | 620718<br>(43.8)  |
| Race, N, %                  |                   |                   |                   |                   |                   |                   |
| White                       | 1219137<br>(85.5) | 1213534<br>(85.3) | 1218383<br>(85.1) | 1215060<br>(84.7) | 1208495<br>(84.4) | 1192235<br>(84.1) |
| Black                       | 118292<br>(8.3)   | 117147<br>(8.2)   | 117008<br>(8.2)   | 117074<br>(8.2)   | 116528<br>(8.1)   | 115047<br>(8.1)   |
| Others                      | 85265<br>(6)      | 86004<br>(6)      | 87590<br>(6.1)    | 88696<br>(6.2)    | 90039<br>(6.3)    | 90394<br>(6.4)    |
| Unknown                     | 3562<br>(0.2)     | 5744<br>(0.4)     | 9287<br>(0.6)     | 13038<br>(0.9)    | 16434<br>(1.1)    | 19295<br>(1.4)    |
| Region, N, %                |                   |                   |                   |                   |                   |                   |
| Northeast                   | 259523<br>(18.2)  | 256304<br>(18)    | 256241<br>(17.9)  | 254448<br>(17.7)  | 251785<br>(17.6)  | 247030<br>(17.4)  |
| Midwest                     | 338546<br>(23.7)  | 335989<br>(23.6)  | 336255<br>(23.5)  | 334731<br>(23.3)  | 332330<br>(23.2)  | 327981<br>(23.1)  |
| South                       | 549788<br>(38.5)  | 548933<br>(38.6)  | 553830<br>(38.7)  | 555981<br>(38.8)  | 556845<br>(38.9)  | 552658<br>(39)    |
| West                        | 257678<br>(18.1)  | 260442<br>(18.3)  | 265494<br>(18.5)  | 269115<br>(18.8)  | 272210<br>(19)    | 272638<br>(19.2)  |
| Others                      | 18875<br>(1.3)    | 18432<br>(1.3)    | 18066<br>(1.3)    | 17613<br>(1.2)    | 17080<br>(1.2)    | 16662<br>(1.2)    |
| Comorbidity, N, %           |                   |                   |                   |                   |                   |                   |
| Myocardial Infarction       | 25987<br>(1.8)    | 32083<br>(2.3)    | 31353<br>(2.2)    | 30356<br>(2.1)    | 29725<br>(2.1)    | 29394<br>(2.1)    |
| Peripheral Vascular Disease | 109420<br>(7.7)   | 144026<br>(10.1)  | 139465<br>(9.8)   | 136529<br>(9.5)   | 134915<br>(9.4)   | 135626<br>(9.6)   |
| Cerebrovascular Disease     | 119628<br>(8.4)   | 137364<br>(9.7)   | 133590<br>(9.3)   | 129848<br>(9.1)   | 125912<br>(8.8)   | 122278<br>(8.6)   |
| Dementia                    | 29968<br>(2.1)    | 40645<br>(2.9)    | 38113<br>(2.7)    | 36089<br>(2.5)    | 34600<br>(2.4)    | 47162<br>(3.3)    |
| Chronic Pulmonary Disease   | 156977<br>(11)    | 187962<br>(13.2)  | 185654<br>(13)    | 184552<br>(12.9)  | 182267<br>(12.8)  | 184045<br>(13)    |
| Rheumatic Disease           | 37874<br>(2.7)    | 43750<br>(3.1)    | 42816<br>(3)      | 41871<br>(2.9)    | 41445<br>(2.9)    | 41768<br>(3)      |
| Peptic Ulcer Disease        | 11127<br>(0.8)    | 14703<br>(1)      | 14072<br>(1)      | 13404<br>(0.9)    | 12744<br>(0.9)    | 12341<br>(0.9)    |
| Mild Liver Disease          | 31878<br>(2.2)    | 40875<br>(2.9)    | 41555<br>(2.9)    | 41572<br>(2.9)    | 42857<br>(3)      | 44438<br>(3.1)    |

|                               |                  |                  |                  |                  |                  |                  |
|-------------------------------|------------------|------------------|------------------|------------------|------------------|------------------|
| Diabetes without Complication | 274214<br>(19.2) | 288508<br>(20.3) | 285087<br>(19.9) | 282276<br>(19.7) | 277724<br>(19.4) | 274126<br>(19.4) |
| Diabetes with Complication    | 54610<br>(3.8)   | 73515<br>(5.2)   | 74527<br>(5.2)   | 76440<br>(5.3)   | 78501<br>(5.5)   | 86855<br>(6.1)   |
| Renal Disease                 | 60669<br>(4.3)   | 82484<br>(5.8)   | 86578<br>(6.1)   | 91990<br>(6.4)   | 96516<br>(6.8)   | 102736<br>(7.3)  |
| Cancer                        | 136923<br>(9.6)  | 146272<br>(10.3) | 144522<br>(10.1) | 143560<br>(10)   | 142285<br>(10)   | 141619<br>(10)   |
| AIDS/HIV                      | 1055<br>(0.1)    | 1141<br>(0.1)    | 1197<br>(0.1)    | 1212<br>(0.1)    | 1270<br>(0.1)    | 1266<br>(0.1)    |
| Charlson's score, median, IQR | 0 (0,1)          | 0 (0,2)          | 0 (0,2)          | 0 (0,2)          | 0 (0,2)          | 0 (0,2)          |

**eTable 3.** Studies Reporting Heart Failure Incidence Trends (presented in chronologic order)

| <b>Author (Year)</b>                 | <b>Country</b> | <b>Study Period</b> | <b>Codes Used to Identify Heart Failure</b>                                                                                                                     | <b>Heart failure Incidence Trend</b>                                                                                                |
|--------------------------------------|----------------|---------------------|-----------------------------------------------------------------------------------------------------------------------------------------------------------------|-------------------------------------------------------------------------------------------------------------------------------------|
| Curtis et al. (2008) <sup>1</sup>    | United States  | 1994-2003           | ICD-9: 428.XX, 402.X1, or 404.X3                                                                                                                                | 32 per 1,000 to 29 per 1,000 persons (age-adjusted), from <b>1994 to 2003</b>                                                       |
| Jhund et al. (2009) <sup>2</sup>     | Scotland       | 1986-2003           | ICD-9 codes: 425.4, 425.5, 425.9, 428.0, 428.1, 428.9, or 402<br>ICD-10 codes: I50, I42.0, I42.6, I42.7, or I42.9)                                              | Men: 1.2 per 1,000 to 1.1 per 1,000 persons<br>Women: 1.3 per 1,000 to 1 per 1,000 persons (age adjusted) from <b>1986 to 2003</b>  |
| Teng et al (2010) <sup>3</sup>       | Australia      | 1990-2005           | ICD-9 codes: 428x, 402.01, 402.11, 402.91, 404.1, 404.3, 425x, 518.4, 514, 391.8, and 398.91<br>ICD-10 codes: I50x, I11.0, I13.0, I13.2, I42x, J81, I01.8, I020 | Men: 1.9 per 1,000 to 1 per 1,000 persons<br>Women: 1.3 per 1,000 to 0.8 per 1,000 persons (age adjusted), from <b>1990 to 2005</b> |
| Ezekowitz et al. (2011) <sup>4</sup> | Canada         | 2000-2006           | ICD-9 codes: 428.x<br>ICD-10 code: I50                                                                                                                          | 5 per 1,000 to 4 per 1,000 persons (age-adjusted) from <b>2000 to 2006</b>                                                          |

|                                         |               |           |                                                                                                                           |                                                                                                                                                                                    |
|-----------------------------------------|---------------|-----------|---------------------------------------------------------------------------------------------------------------------------|------------------------------------------------------------------------------------------------------------------------------------------------------------------------------------|
| Zarrinkoub et al (2013) <sup>5</sup>    | Sweden        | 2006-2010 | ICD-10 code: I50                                                                                                          | Men: 4 per 1,000 to 3 per 1,000 persons<br>Women: 4 per 1,000 to 3 per 1,000 persons (age adjusted) from <b>2006 to 2010</b>                                                       |
| Gerber et al (2015) <sup>6</sup>        | United States | 2000-2010 | ICD-9 codes: 428, 425, 429.3, and 514                                                                                     | 3 per 1,000 to 2 per 1,000 persons (age and sex adjusted) from <b>2000 to 2010</b>                                                                                                 |
| Christiansen et al. (2017) <sup>7</sup> | Denmark       | 1995-2012 | ICD-10 codes: DI50, DI110, DI42, DI43, DI130, DI132, DO903<br>ICD-8 codes: 427.09, 427.10, 427.11, 427.19, 428.99, 428.49 | Adjusted (age and sex) incident rate ratios<br>≤50 years old: 1.02 (0.89–1.83) to 1.52 (1.33–1.73)<br>>50 years old: 1.02 (0.99–1.05) to 0.69 (0.67–0.71) from <b>1995 to 2012</b> |
| Khera et al. (2017) <sup>8</sup>        | United States | 2002-2013 | ICD-9 codes: 428.x, 402.x1, 404.x1, and 404.x3                                                                            | 39 per 1,000 to 26 per 1,000 persons (age adjusted) <b>2002 to 2013</b>                                                                                                            |

|                                    |                |           |                                                                                                                                                                                                                                                                                                                                                                                                                                                                                                                                                                                                                        |                                                                                                                       |
|------------------------------------|----------------|-----------|------------------------------------------------------------------------------------------------------------------------------------------------------------------------------------------------------------------------------------------------------------------------------------------------------------------------------------------------------------------------------------------------------------------------------------------------------------------------------------------------------------------------------------------------------------------------------------------------------------------------|-----------------------------------------------------------------------------------------------------------------------|
| Tsao et al (2018) <sup>9</sup>     | United States  | 1990-2009 | Incident heart failure diagnoses adjudicated by physician panel                                                                                                                                                                                                                                                                                                                                                                                                                                                                                                                                                        | 20 per 1,000 to 19 per 1,000 persons from <b>1990–1999 to 2000–2009</b>                                               |
| Conrad et al. (2018) <sup>10</sup> | United Kingdom | 2002-2014 | ICD-10 codes: I50.0, I50.1, I50.9, I42.0, I42.9, I11.0, I25.5, I13.2, I13.0<br>Primary care read codes: G581.00, G58.00, G580.11, G5yy900, G55..00, 585f.00, G58..11, G581.133, 33BA.00, 101..00, G5yyA00, G551.00, G41z.11, G58z.00, G554400, 662g.00, G581000, G580.12, G554300, 1O1..00, G580.14, G343.00, G58z.12, 662h.00, G582.00, G58z.00, G5yyD00, 6622f.00, G583.00, G580100, G555.00, G580.13, G55y.11, G580200, 8H2S.00, 8H2S.00, G554200, G583.12, G584.00, G554000, G580300, G559.00, G583.11, 8CMW800, G580400, G558100, Gyu5M00, G1yz100, 662i.00, 661M500, 8CMK.00, G21z100, G211100, G232.00, 8CeC.00 | 4 per 1,000 to 3 per 1,000 persons (age and sex adjusted), from <b>2002 to 2014</b>                                   |
| Sulo et al. (2020) <sup>11</sup>   | Norway         | 2000-2014 | ICD-9 codes: 402.01, 402.11, 402.3, 402.7, 402.91, 425.4, 425.5, 425.9, 428, 428.x<br><br>ICD-10 codes: I09.81, I11.0, I50, and I50                                                                                                                                                                                                                                                                                                                                                                                                                                                                                    | Men: 2,055 to 1,805 persons<br>Women: 1,962 to 1,625 persons<br>Incident heart failure cases from <b>2000 to 2014</b> |

**eFigure 1.** Percentage of Beneficiaries in Each Comorbid Group Among Those Who Developed Heart Failure and Those Who Did Not Develop Heart Failure, Yearly Trend. Hypertension (A), Diabetes (B), Obesity (C), Acute Myocardial Infarction (D), and Atrial Fibrillation (E). AF: Atrial fibrillation; AMI: Acute myocardial infarction.

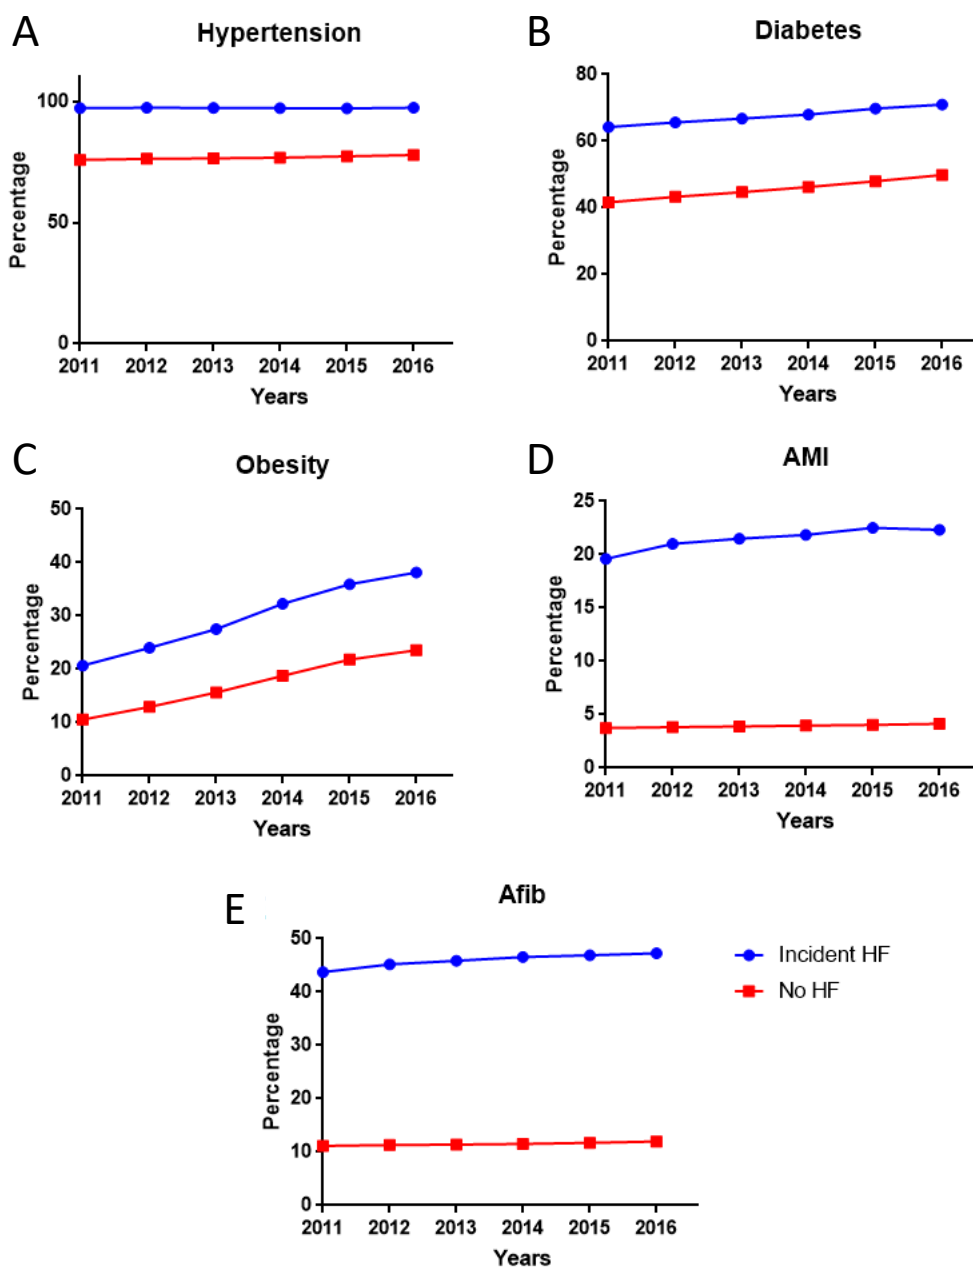



**eFigure 2.** 30-day Unadjusted Mortality Rate Among Beneficiaries with Incident Heart Failure Stratified by Sex (A) and Race (B), Yearly Trend. The p-value reflects trends in the mortality rate over time. (Mortality rate per 1000 persons)

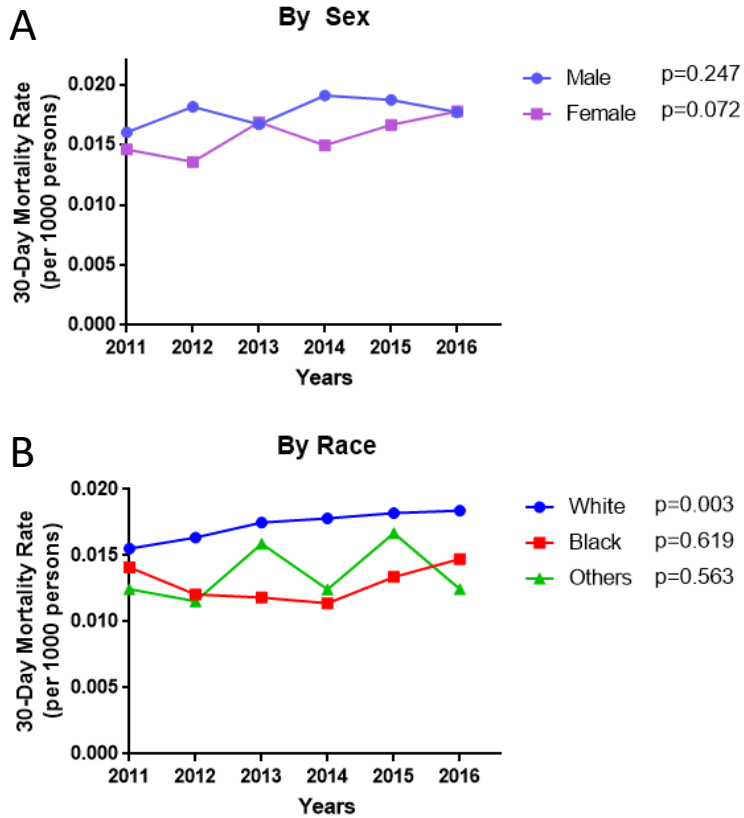

**eFigure 3.** Incident Rate of Heart Failure Among Beneficiaries by Comorbid Groups: Hypertension (A), Diabetes (B), Obesity (C), Acute Myocardial Infarction (D), and Atrial Fibrillation (E), Yearly Trend. AF: Atrial fibrillation; AMI: Acute myocardial infarction. 2-year period of claims used to exclude prevalent heart failure.

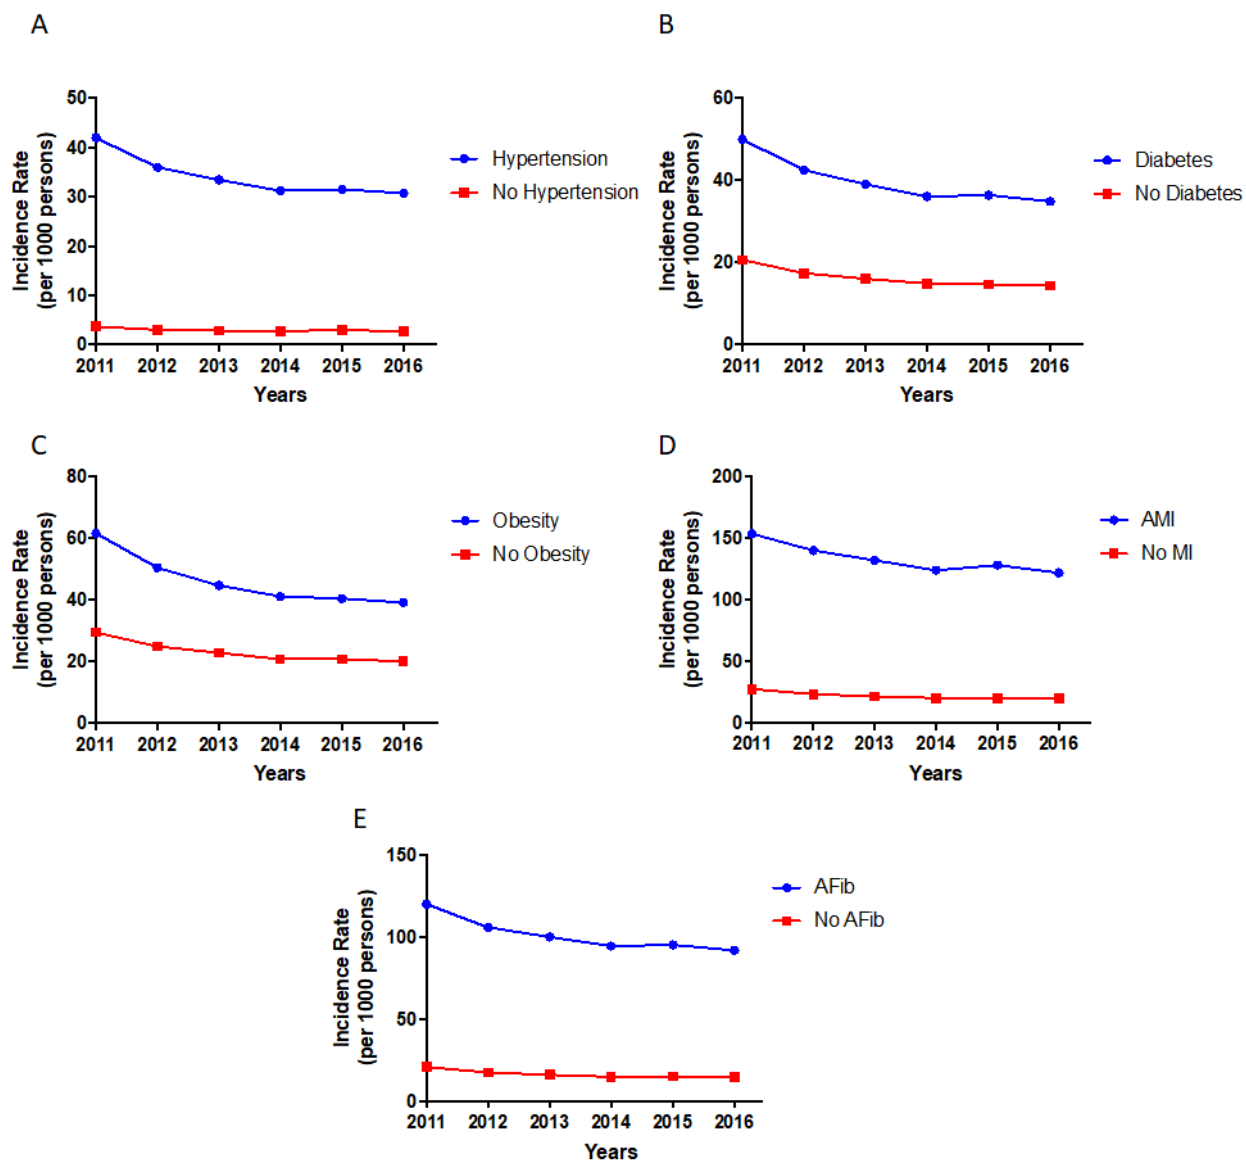

**eFigure 4.** Adjusted Incidence Rate Ratios for Heart Failure Among Beneficiaries With vs. Without Each Risk Factor Over Time, Hypertension (A), Diabetes (B), Obesity (C), Acute Myocardial Infarction (D), and Atrial Fibrillation (E), Yearly Trend. Poisson regression models were constructed to determine the association of each risk factor with HF incidence for each year with adjustment for age, sex, race, socioeconomic status, and all 5 risk factors. The p-value reflects trends in the incidence rate ratio over time. AF: Atrial fibrillation; AMI: Acute myocardial infarction. 2-year period of claims used to exclude prevalent heart failure.

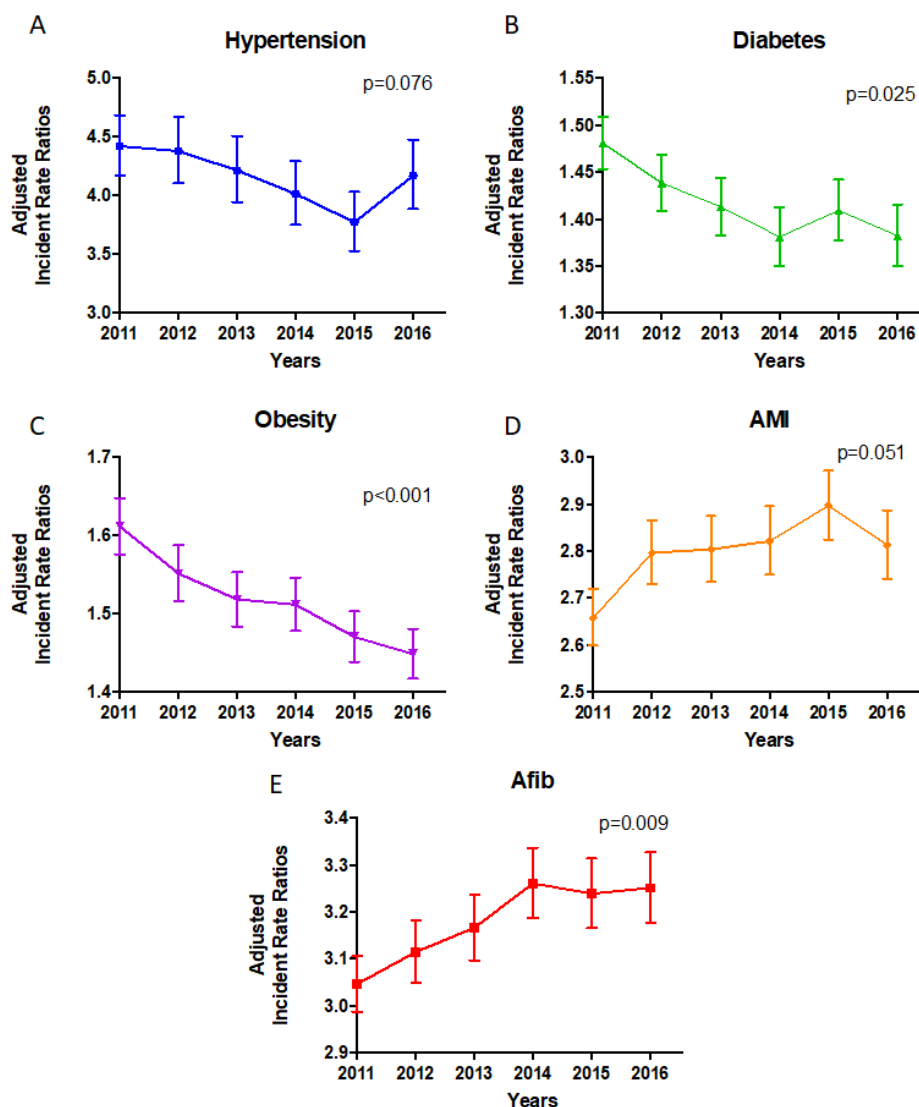

## eReferences

1. Curtis LH, Whellan DJ, Hammill BG, et al. Incidence and prevalence of heart failure in elderly persons, 1994-2003. *Arch Intern Med*. 2008;168(4):418-424.
2. Jhund PS, Macintyre K, Simpson CR, et al. Long-term trends in first hospitalization for heart failure and subsequent survival between 1986 and 2003: a population study of 5.1 million people. *Circulation*. 2009;119(4):515-523.
3. Teng TH, Finn J, Hobbs M, Hung J. Heart failure: incidence, case fatality, and hospitalization rates in Western Australia between 1990 and 2005. *Circ Heart Fail*. 2010;3(2):236-243.
4. Ezekowitz JA, Kaul P, Bakal JA, Quan H, McAlister FA. Trends in heart failure care: has the incident diagnosis of heart failure shifted from the hospital to the emergency department and outpatient clinics? *Eur J Heart Fail*. 2011;13(2):142-147.
5. Zarrinkoub R, Wettermark B, Wandell P, et al. The epidemiology of heart failure, based on data for 2.1 million inhabitants in Sweden. *Eur J Heart Fail*. 2013;15(9):995-1002.
6. Gerber Y, Weston SA, Redfield MM, et al. A contemporary appraisal of the heart failure epidemic in Olmsted County, Minnesota, 2000 to 2010. *JAMA Intern Med*. 2015;175(6):996-1004.
7. Christiansen MN, Kober L, Weeke P, et al. Age-Specific Trends in Incidence, Mortality, and Comorbidities of Heart Failure in Denmark, 1995 to 2012. *Circulation*. 2017;135(13):1214-1223.
8. Khera R, Pandey A, Ayers CR, et al. Contemporary Epidemiology of Heart Failure in Fee-For-Service Medicare Beneficiaries Across Healthcare Settings. *Circ Heart Fail*. 2017;10(11).
9. Tsao CW, Lyass A, Enserro D, et al. Temporal Trends in the Incidence of and Mortality Associated With Heart Failure With Preserved and Reduced Ejection Fraction. *JACC Heart Fail*. 2018;6(8):678-685.
10. Conrad N, Judge A, Tran J, et al. Temporal trends and patterns in heart failure incidence: a population-based study of 4 million individuals. *Lancet*. 2018;391(10120):572-580.
11. Sulo G, Igland J, Overland S, et al. Heart failure in Norway, 2000-2014: analysing incident, total and readmission rates using data from the Cardiovascular Disease in Norway (CVDNOR) Project. *Eur J Heart Fail*. 2020;22(2):241-248.
